# Supplementary material
Source: PubMed Central journal article supplement (PMC6034112)
Supplement: NIHMS965989-supplement-supplement_1.pdf [file NIHMS965989-supplement-supplement_1.pdf]

# Myocardial Injury and Cardiac Reserve Limitation in Heart Failure with Preserved Ejection Fraction

Masaru Obokata MD PhD,<sup>1</sup> Yogesh N. V. Reddy MBBS,<sup>1</sup> Vojtech Melenovsky MD PhD,<sup>1,2</sup>

Garvan C. Kane MD PhD,<sup>1</sup> Thomas P. Olson PhD,<sup>1</sup> Petr Jarolim MD PhD,<sup>3</sup>

Barry A. Borlaug MD<sup>1</sup>

## SUPPLEMENTAL MATERIAL

**Short Title:** *Pathophysiology of Myocardial Injury in HFpEF*

**Word count:** 2944

**Address for correspondence:**

Barry A. Borlaug, MD  
Mayo Clinic and Foundation  
200 First Street SW  
Rochester, MN 55905  
Phone: 507-284-4442  
Fax: 507-266-0228  
Email: [borlaug.barry@mayo.edu](mailto:borlaug.barry@mayo.edu)

**Supplemental Table 1: Correlations between Proportional Changes in Hemodynamics and Troponin T during Exercise**

|                                                  | <b>r coefficient</b> | <b>P value</b> |
|--------------------------------------------------|----------------------|----------------|
| Change in Right atrial pressure (%)              | 0.31                 | 0.02           |
| Change in PCWP (%)                               | 0.36                 | 0.006          |
| Change in systolic $PTI_C$ (%)                   | 0.33                 | 0.02           |
| Change in coronary $PTI_C$ (%)                   | -0.06                | 0.6            |
| Change in coronary $PTI_C$ /systolic $PTI_C$ (%) | -0.31                | 0.02           |

PCWP, pulmonary capillary wedge pressure,  $PTI_C$ , corrected pressure-time integral. See text for details.

**Supplemental Table 2: Correlation of Baseline Troponin T with LV diastolic and systolic reserve during exercise**

|                                            | <b>r coefficient</b> | <b>P value</b> |
|--------------------------------------------|----------------------|----------------|
| <b>Exercise</b>                            |                      |                |
| Mitral annular e' velocity (cm/s)          | -0.51                | 0.0006         |
| Mitral annular s' velocity (cm/s)          | -0.40                | 0.01           |
| $\Delta$ Mitral annular e' velocity (cm/s) | -0.47                | 0.003          |
| $\Delta$ Mitral annular s' velocity (cm/s) | -0.53                | 0.0007         |

Supplemental Table 3: Sensitivity Analysis Stratifying HFpEF Patients Based on the Presence of Coronary Disease

|                                                                             | <i>Rest</i>          |                               | <i>20W</i>           |                               | <i>Peak</i>          |                               |
|-----------------------------------------------------------------------------|----------------------|-------------------------------|----------------------|-------------------------------|----------------------|-------------------------------|
|                                                                             | Non CAD-HFpEF (n=23) | CAD-HFpEF (n=15)              | Non CAD-HFpEF (n=23) | CAD-HFpEF (n=15)              | Non CAD-HFpEF (n=23) | CAD-HFpEF (n=15)              |
| <b>Hemodynamics</b>                                                         |                      |                               |                      |                               |                      |                               |
| PCWP (mmHg)                                                                 | 17±5                 | 19±7                          | 31±5                 | 33±5                          | 34±7                 | 35±5                          |
| <b>Myocardial Oxygen Supply &amp; Demand</b>                                |                      |                               |                      |                               |                      |                               |
| Rate pressure product (mmHg·min <sup>-1</sup> )                             | 10346±2736           | 9509±2018                     | 16822±5204           | 14085±3716                    | 19787±5957           | 16030±4229*                   |
| Systolic PTI <sub>C</sub> (mmHg·sec·min <sup>-1</sup> ·kg·m <sup>-2</sup> ) | 238±77               | 257±55                        | 311±109              | 327±71                        | 342±127              | 347±79                        |
| Coronary PTI <sub>C</sub> (mmHg·sec·min <sup>-1</sup> ·L·dL <sup>-1</sup> ) | 41±8                 | 41±15                         | 30±6                 | 31±12                         | 28±6                 | 29±10                         |
| Coronary PTI <sub>C</sub> /systolic PTI <sub>C</sub>                        | 0.18±0.04            | 0.17±0.07                     | 0.10±0.03            | 0.10±0.05                     | 0.09±0.03            | 0.09±0.04                     |
| <b>Ventricular function</b>                                                 |                      |                               |                      |                               |                      |                               |
| Mitral annular e' velocity (cm/s)                                           | 8±2                  | 6±2 <sup>†</sup>              | 8±2                  | 6±2 <sup>†</sup>              | 9±3                  | 6±1 <sup>‡</sup>              |
| Mitral annular s' velocity (cm/s)                                           | 7±2                  | 5±1 <sup>†</sup>              | 8±2                  | 6±2*                          | 9±2                  | 6±2 <sup>†</sup>              |
| <b>Cardiomyocyte Injury</b>                                                 |                      |                               |                      |                               |                      |                               |
| <i>hs troponin T</i> (ng/L)                                                 | 8.7 (9.0,19.8)       | 22.0 (11.7,29.4) <sup>†</sup> | 10.5 (6.3,21.4)      | 23.6 (12.9,32.1) <sup>†</sup> | 10.7 (7.1,21.7)      | 19.0 (13.0,33.5) <sup>‡</sup> |

\*p<0.05, <sup>†</sup>p<0.01, and <sup>‡</sup>p<0.001 vs. Non CAD-HFpEF. CAD indicates coronary artery disease; HFpEF, heart failure with preserved ejection fraction; and other abbreviations as in Supplemental Table 1
